# Supplementary material for: Early differentiation between paroxysmal and persistent atrial fibrillation based on interpretable machine learning: a multicenter retrospective study
Source: Research Square preprint supplement (doi:10.21203/rs.3.rs-7302454/v1), 2025-09-09
Supplement: Supplementary file 1 [file 77354b92b275ab6059e250eb.docx]

**Supplementary Materials**

**Figures**

**
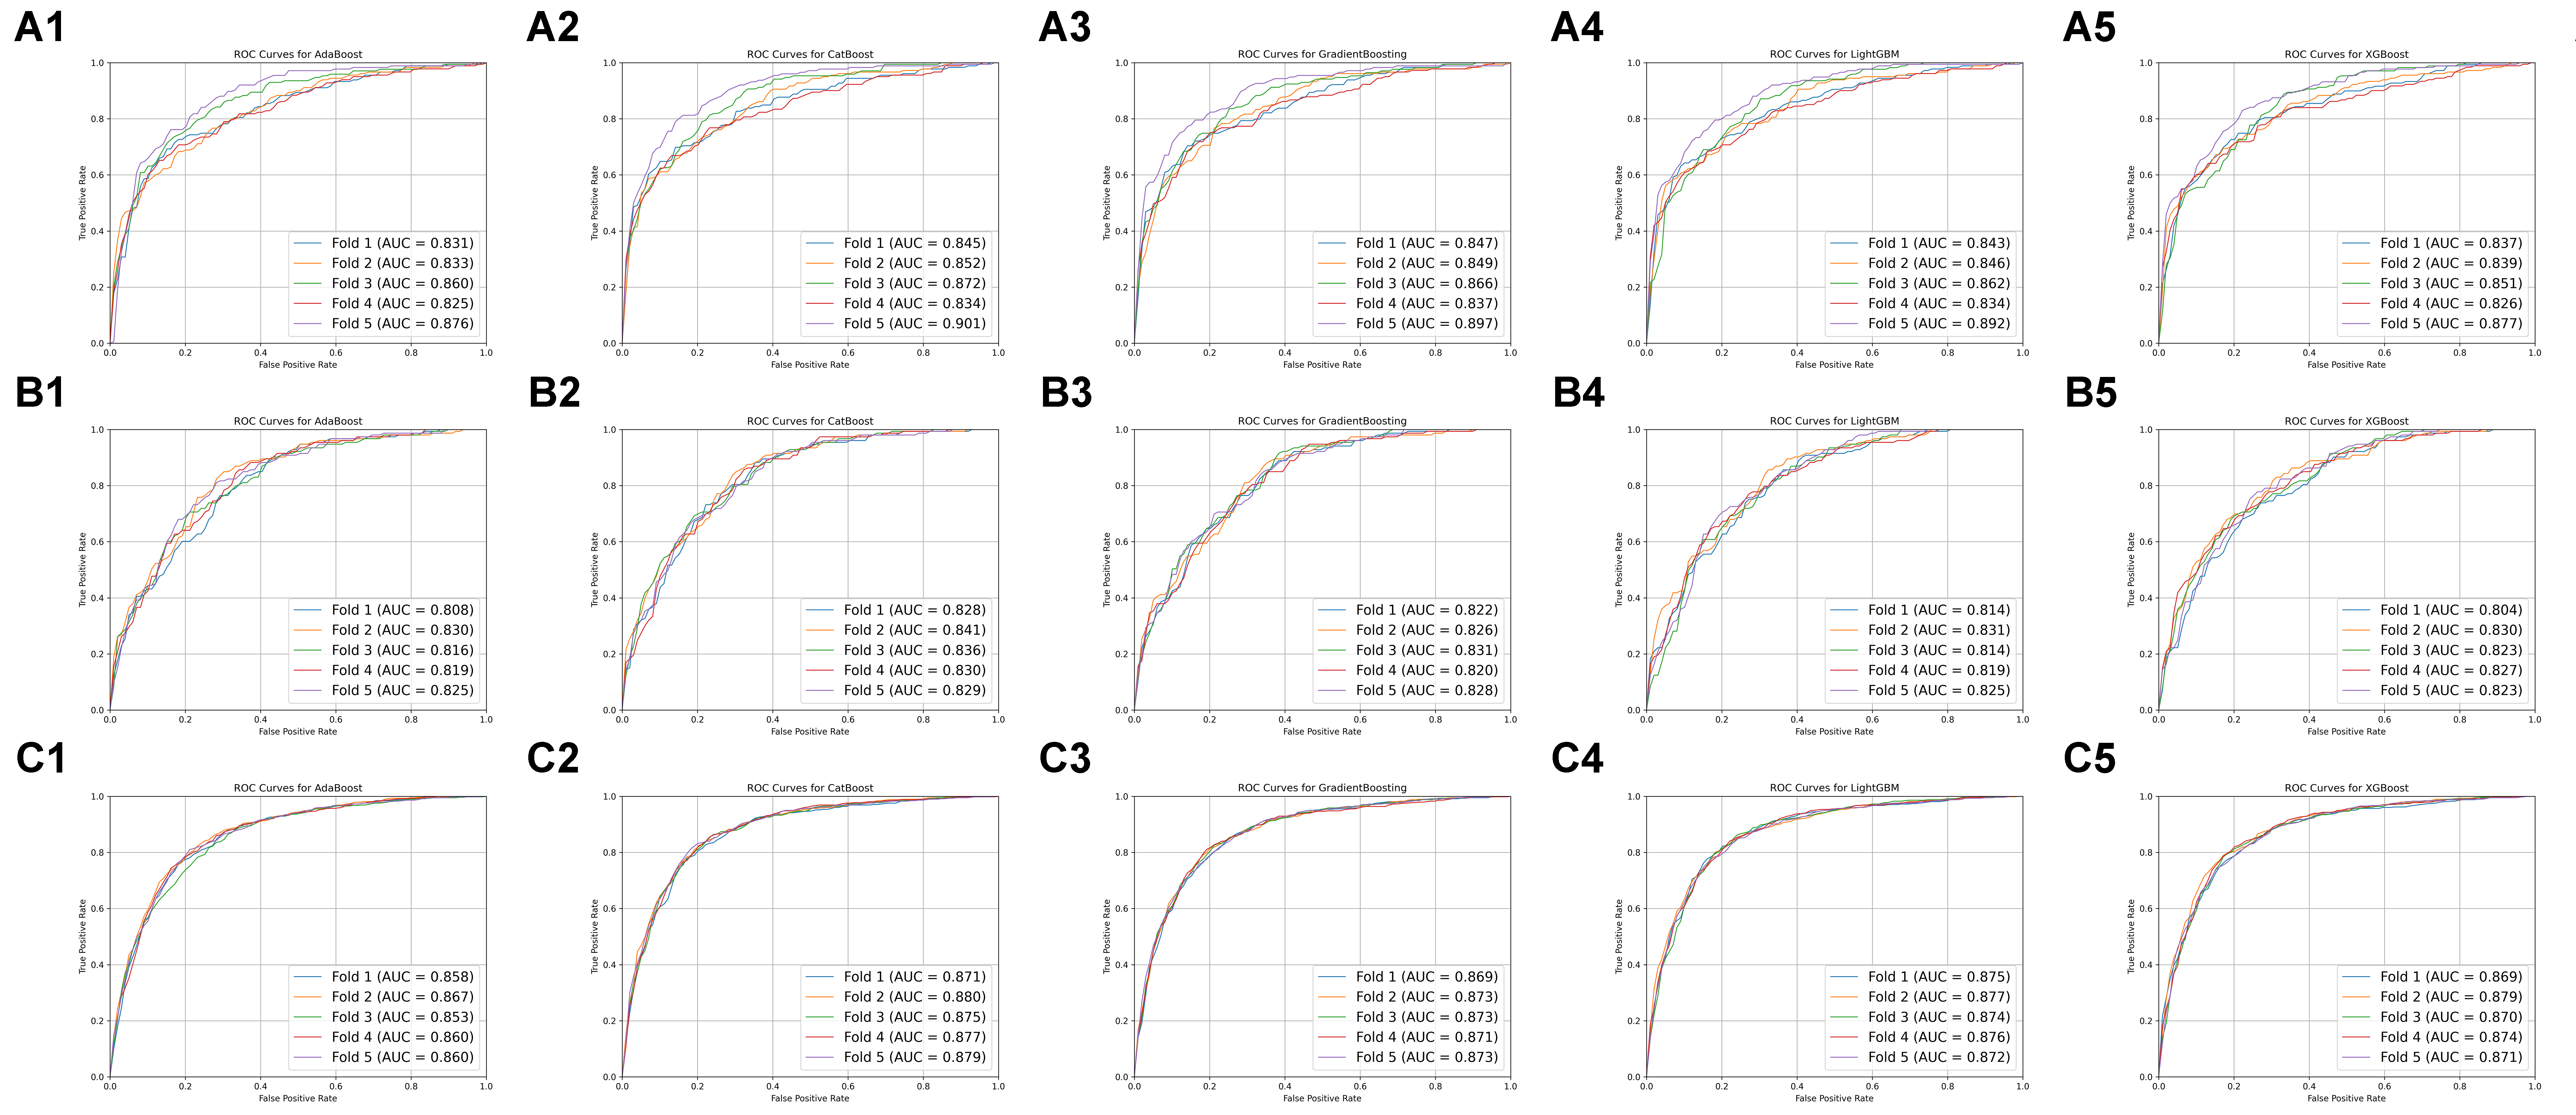
**

**Figure 1. Five-fold cross validation and AUC results of every fold in three centers.**

**
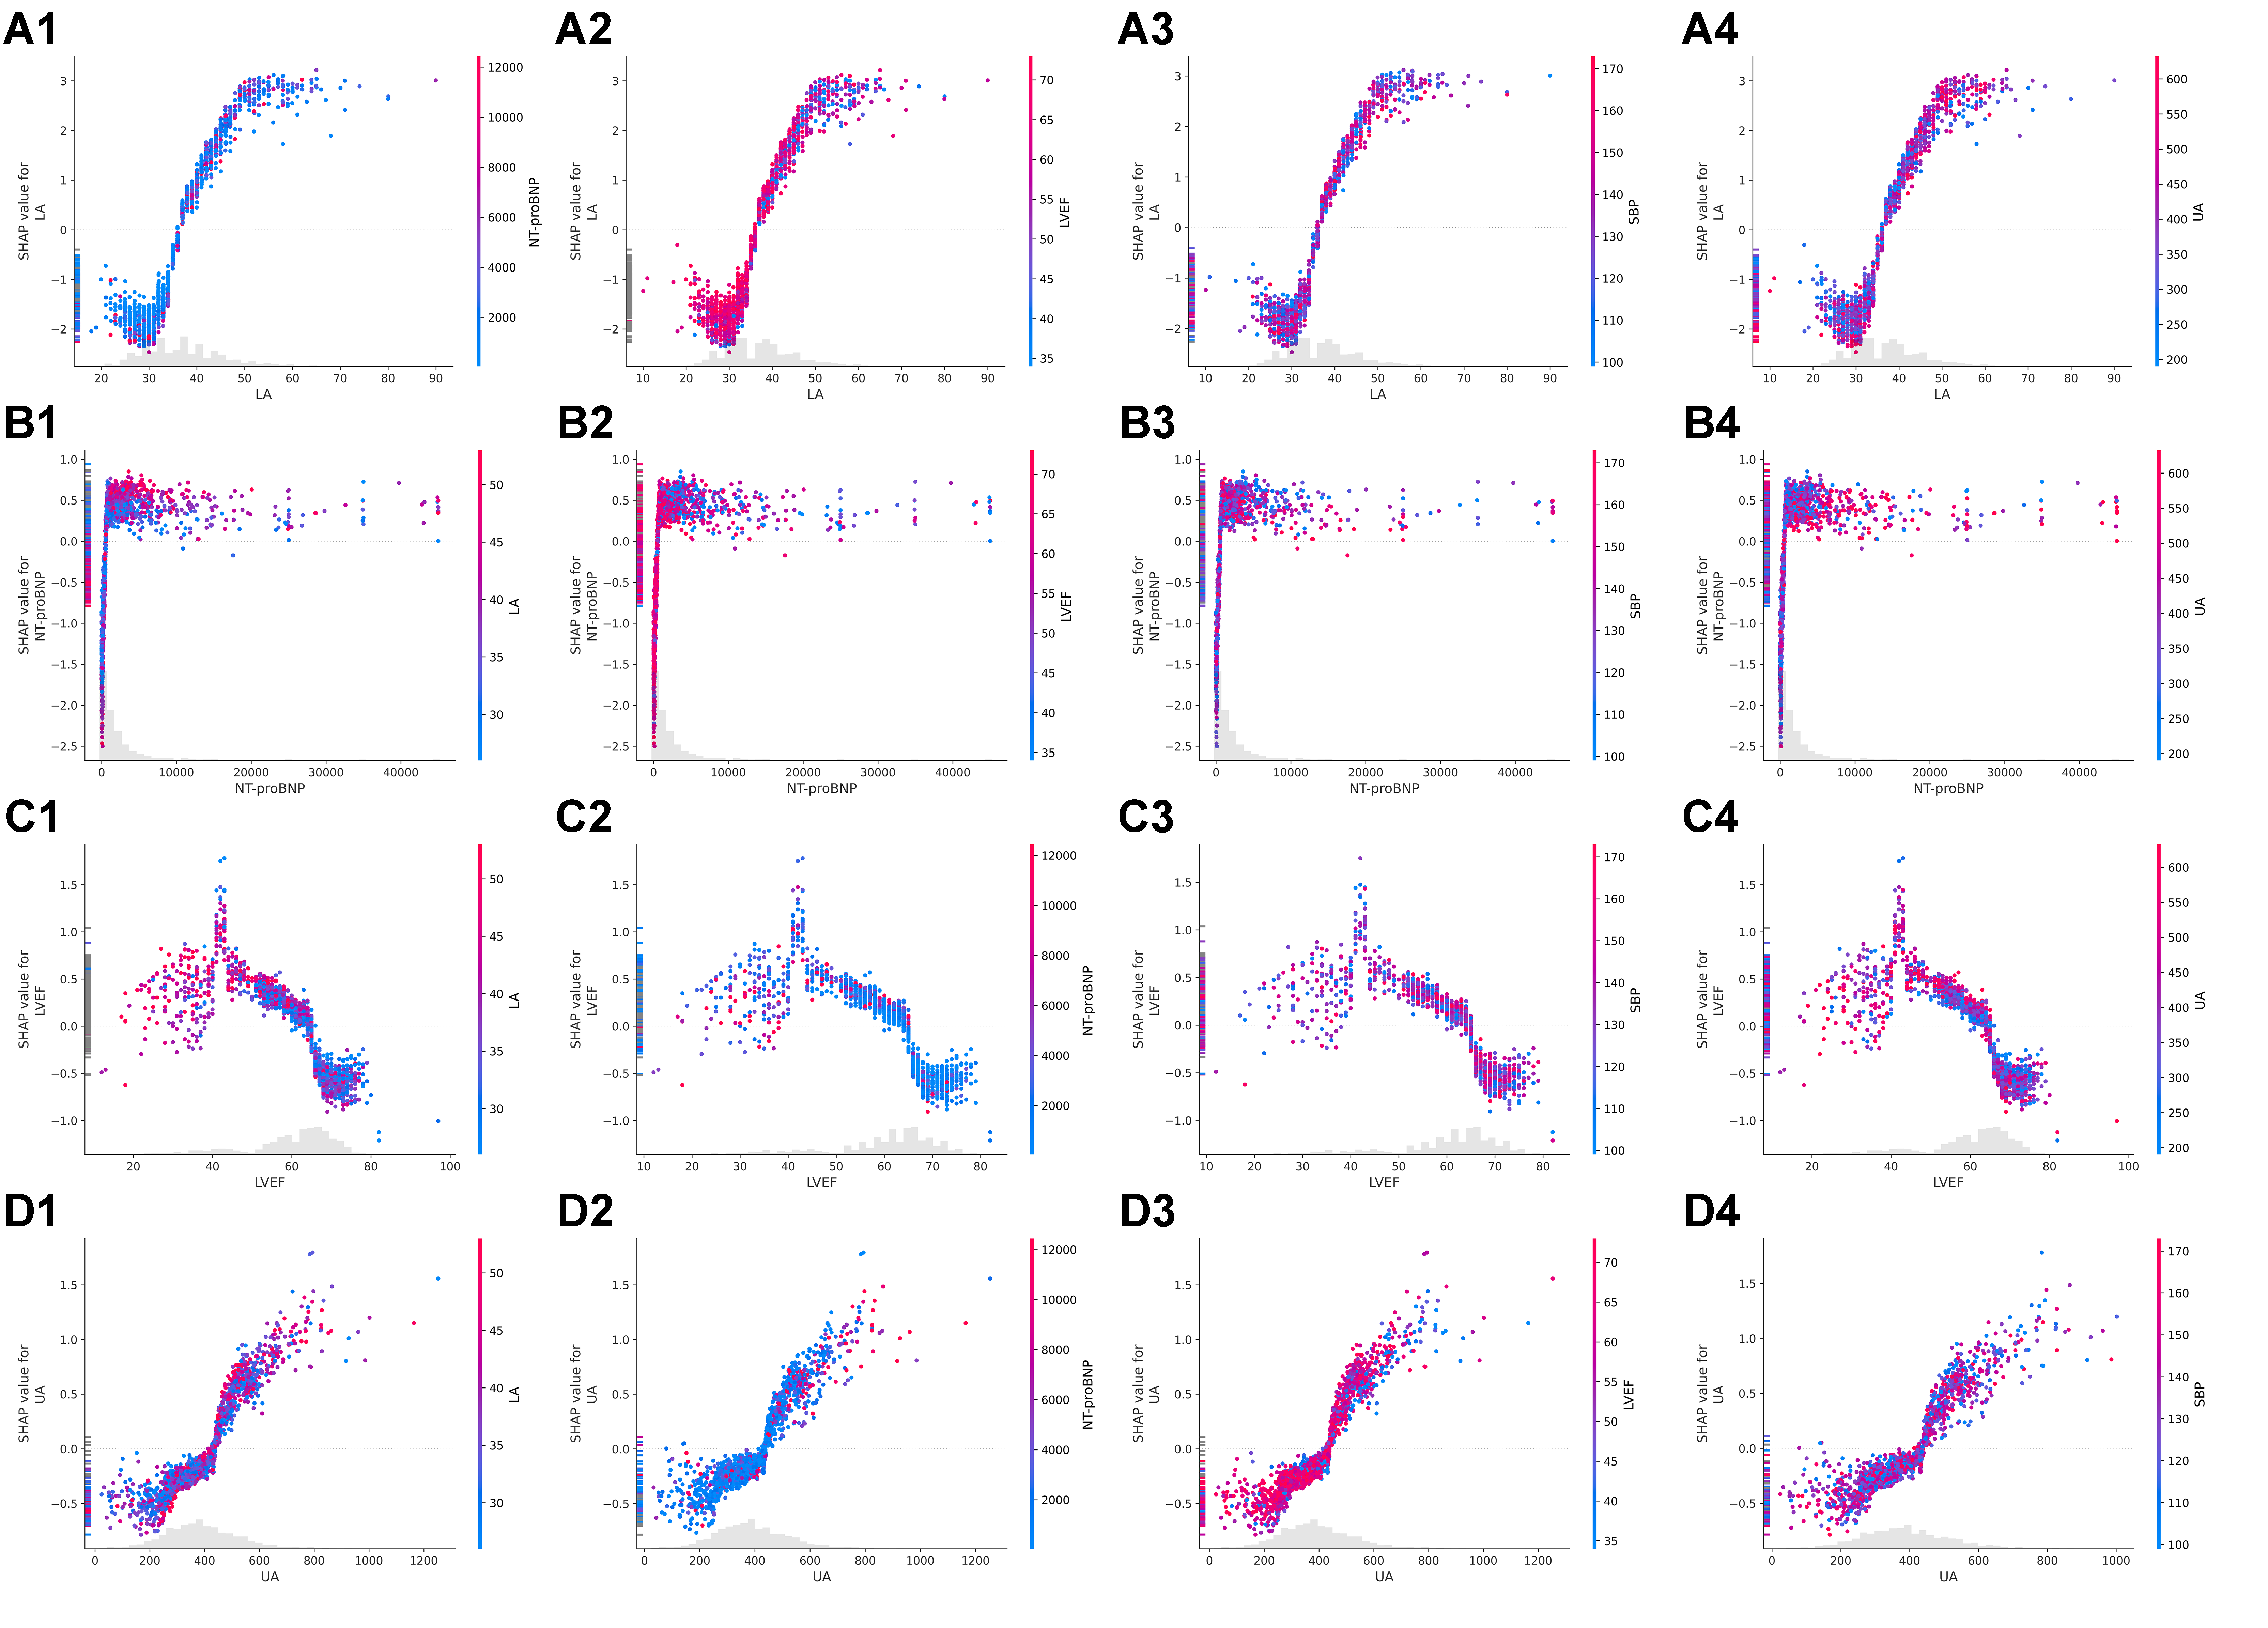
**

**Figure 2. Scatter plot of the correlation between the top five variables based on the SHAP method.**

**
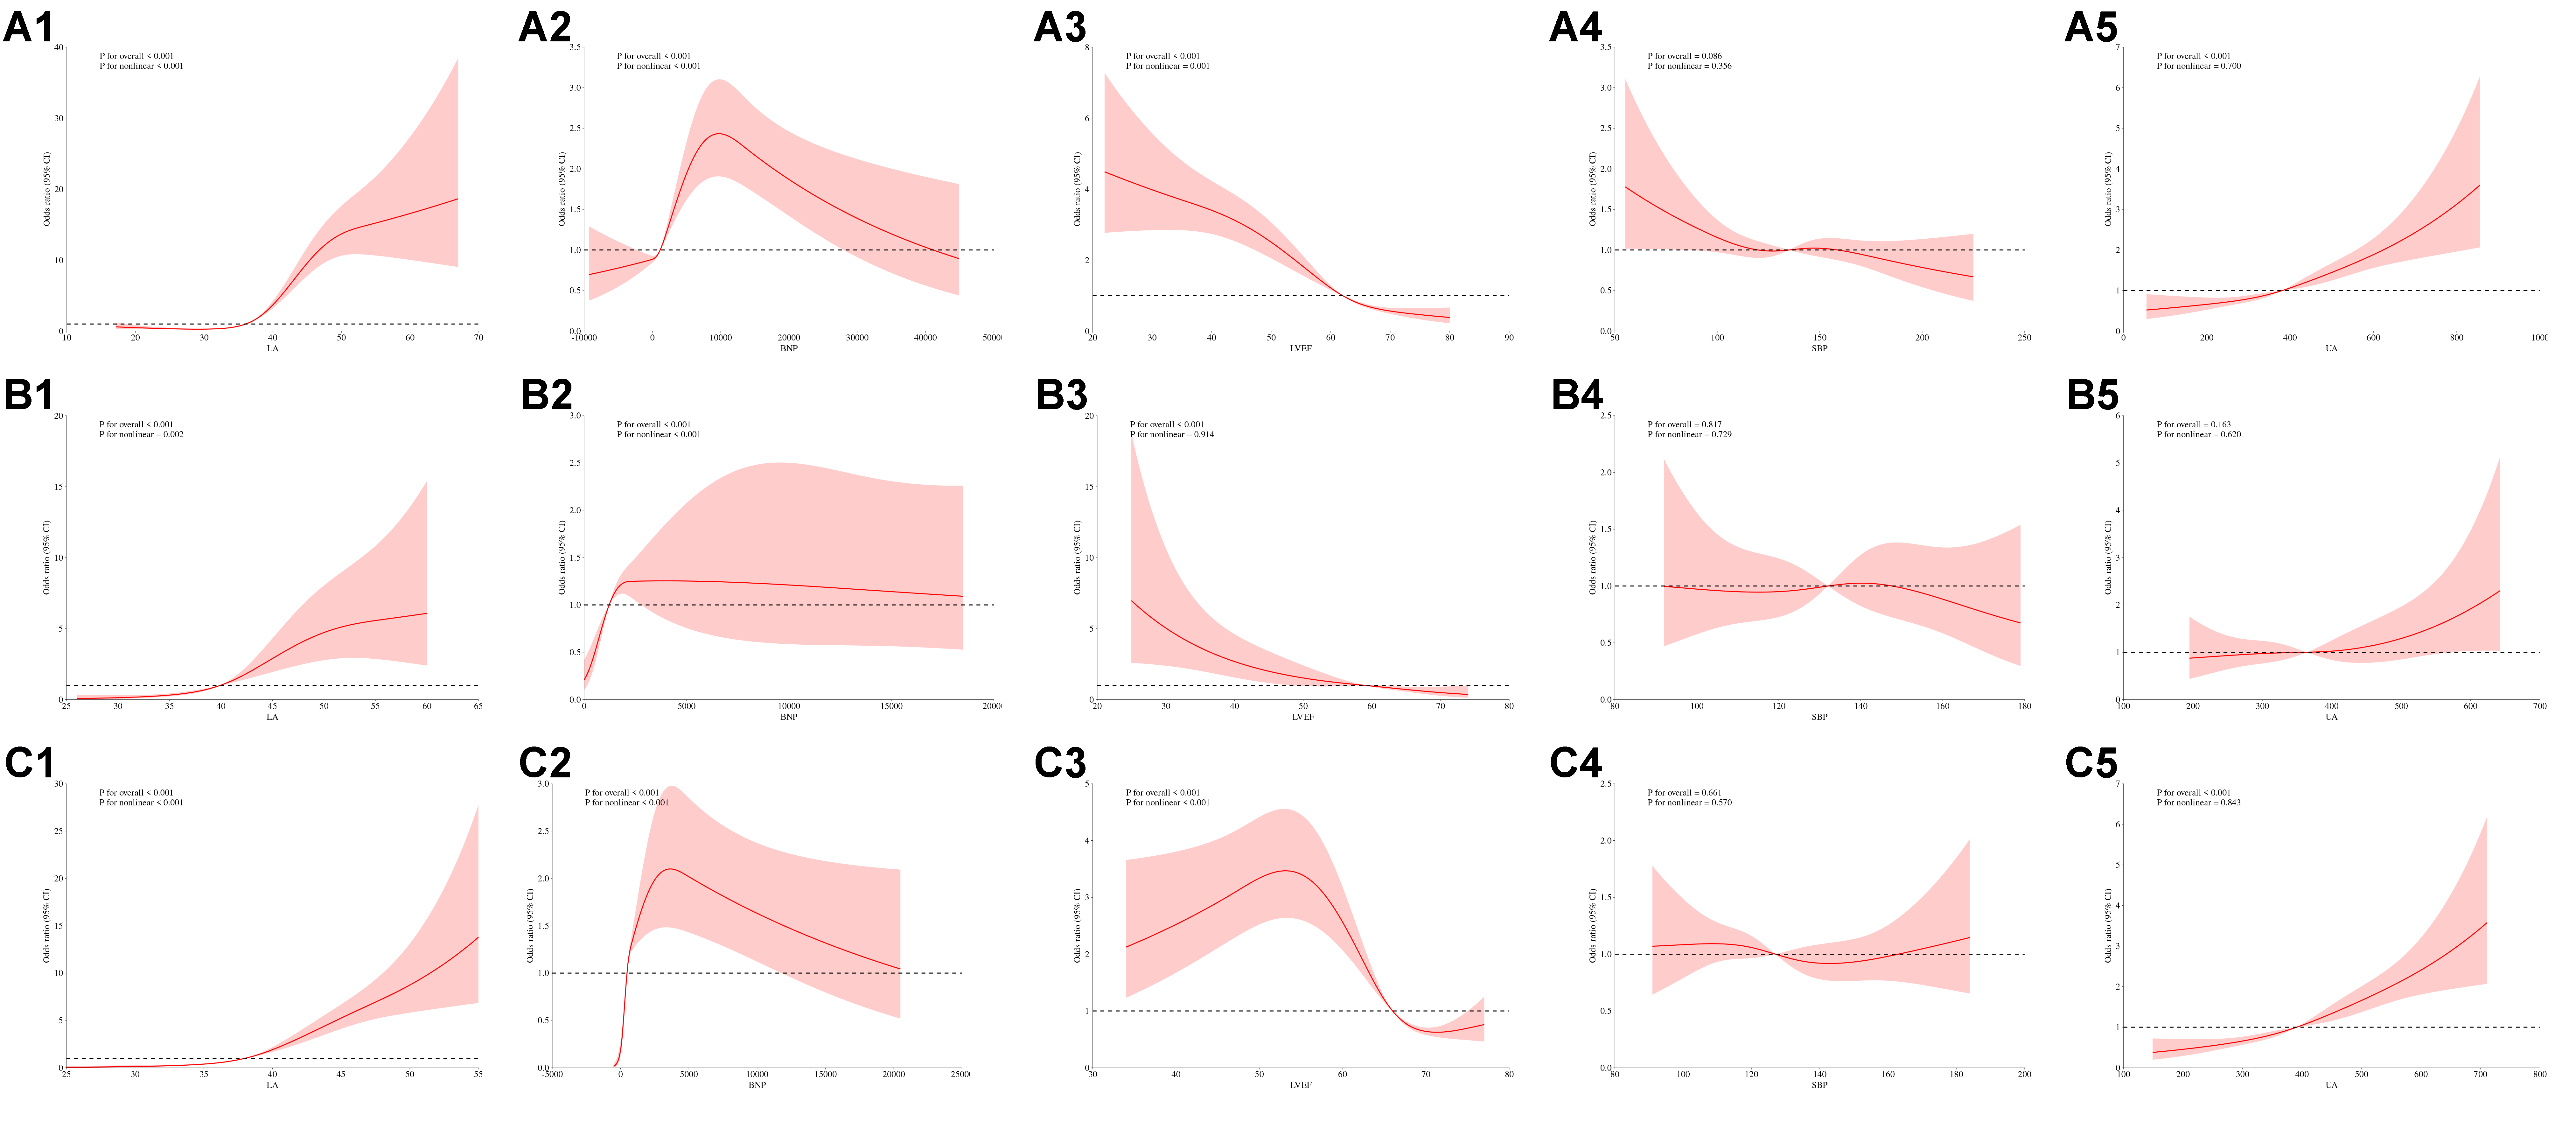
**

**Figure 3. Nonlinear associations between key variables and AF subtypes across centers.**

**
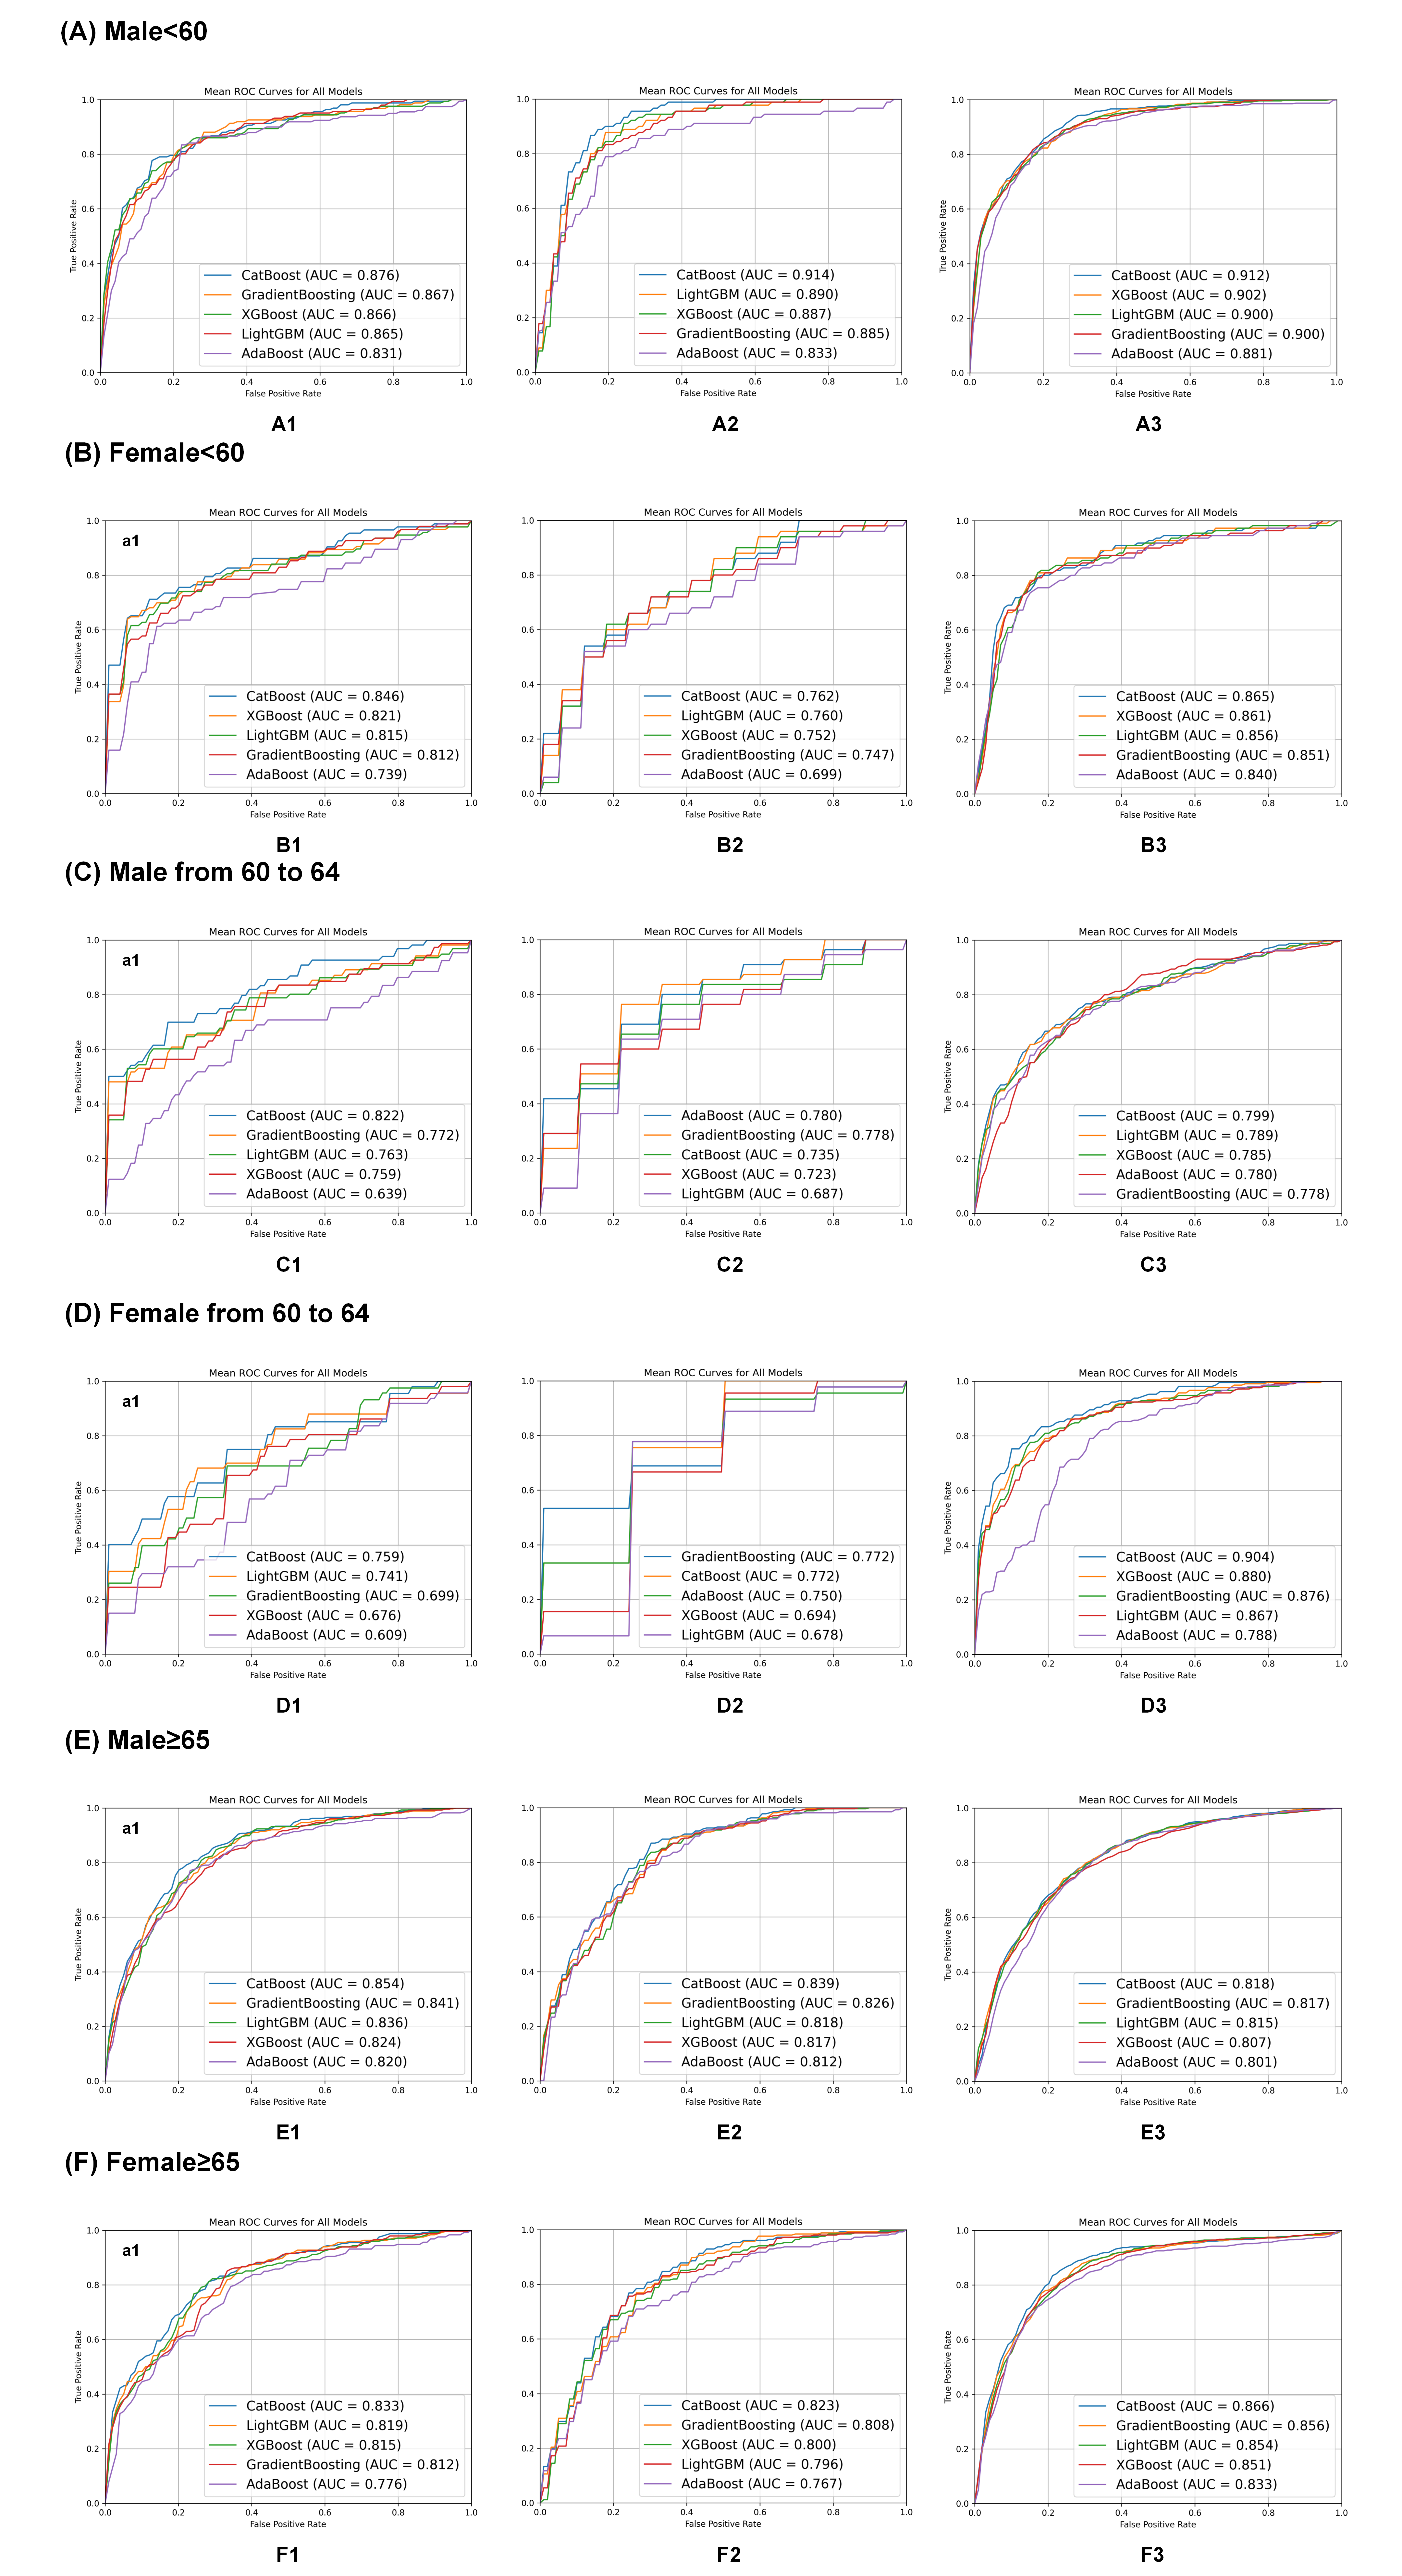
**

**Figure 4. Model prediction performance by AUC in different age subgroups.**

Figure 4 shows the AUC results in different age subgroups. The order of Figure 5A-5F are the male and female under 60 years old, aged 60 to 64 years old, and aged 65 and above. As for A-F, 1-3 are the results of DH, SSH, and SYSMH centers respectively.

**
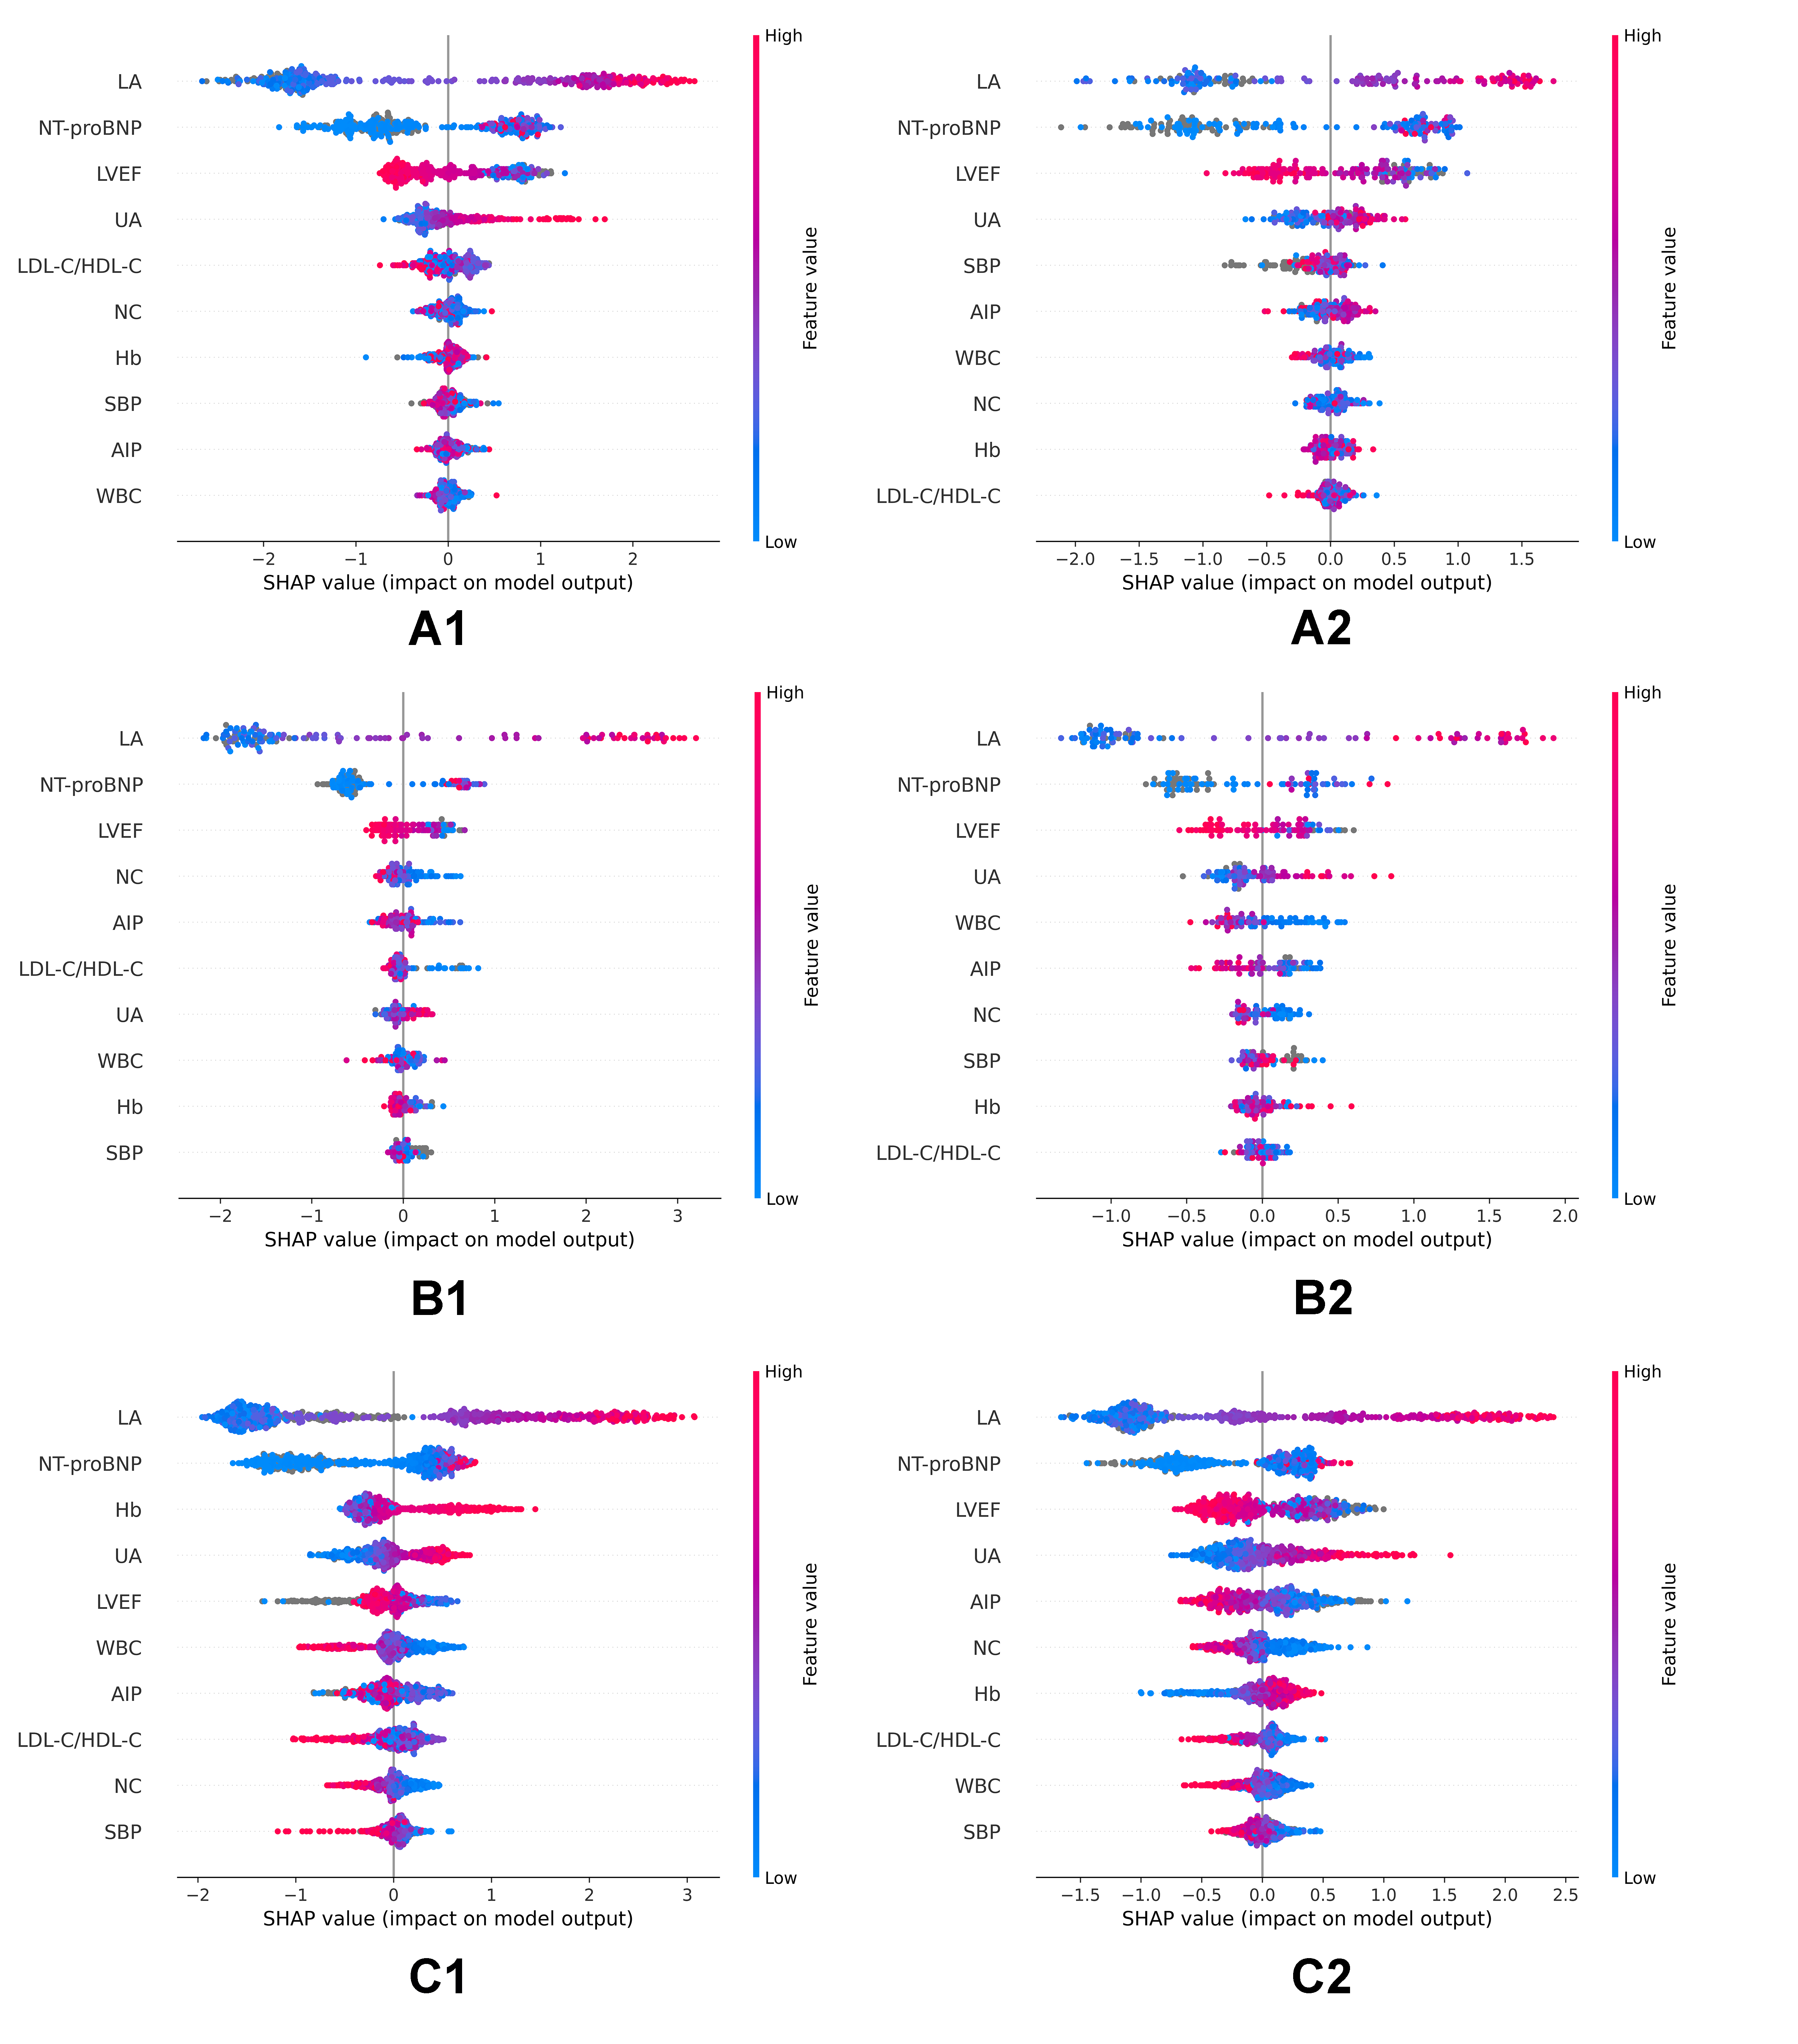
**

**Figure 5. Interpretability of variables within different subgroups based on the SHAP method.**

| **Table 1. Recorded variables** | | | |
| --- | --- | --- | --- |
| **Name of Variables** | | | |
| Age | Anticoagulant | ApoE | hCRP |
| Gender | ACEI/ARB | **WBC** | SOD |
| Diagnose | beta-Blocker | **NC** | HbA1c |
| Height | Amiodarone | PLT | AOR |
| Weight | **AIP** | **Hb** | AAO |
| **SBP** | RC | AST | **LA** |
| DBP | **LDL-C/HDL-C** | ALT | RVDd |
| Smoking status | TC | eGFR | IVSd |
| Drinking status | TG | Cr | LVDd |
| HTN | HDL-C | **UA** | LVPWd |
| DM | LDL-C | CK | AV |
| Statins | ApoA1 | CK-MB | **LVEF** |
| Antiplatelet | ApoB | **NT-proBNP** | Diagnose (paroxysmal or persistent AF) |
| Bolded variables are those that are ultimately included in the model. AAO, ascending aorta; ACEI/ARB, used ACEI/ARB drugs ever; AIP, atherogenic index of plasma; ALT, glutamic-pyruvic transaminase; Amiodarone, used amiodarone drugs ever; Anticoagulant, used anticoagulant drugs ever; Antiplatelet, used antiplatelet drugs ever; AOR, aortic root; ApoA1, apolipoprotein a1; ApoB, apolipoprotein b; ApoE, apolipoprotein e; AST, glutamic-oxalacetic transaminase; AF, atrial fibrillation; AV, aortic opening flow velocity; beta-Blocker, used beta-blocker drugs ever; CK, Creatine kinase; CK-MB, Creatine kinase-MB; Cr, Creatinine; DM, diabetes mellitus history; Drinking status, drinking alcohols ever; DBP, diastolic blood pressure; Diagnose, paroxysmal or persistent AF diagnose at discharge ; eGFR, estimated glomerular filtration rate; Hb, hemoglobin; HbA1c, hemoglobin A1c; hCRP. hypersensitive c-reactive protein; HDL-C, high density lipoprotein cholesterol; HTN, hypertension history; IVSd, Interventricular septum at end-diastole; LA, left atrial diameter; LDL-C, low density lipoprotein cholesterol; LVDd, left ventricular end-diastolic diameter; LVEF, left ventricular ejection fraction; LVPWd, left ventricular posterior wall diameter; NC, Neutrophil; NT-proBNP, N-terminal brain natriuretic peptide precursor; PLT, platelet; RC, remnant cholesterol; RVDd, Right ventricular end-diastolic; SBP, systolic blood pressure; Smoking status, smoking ever; SOD, Superoxide dismutase; Statins, used statins drugs ever; TC, total cholesterol; TG, triglyceride; UA, uric acid; WBC, white blood cell. | | | |

| **Table 2. Results of model output indicators in subgroups in DH** | | | | | | | |
| --- | --- | --- | --- | --- | --- | --- | --- |
| **Model** | **ACC** | **Precision** | **Recall** | **AUC** | **F1 Score** | **SEN** | **SPE** |
| **Male < 60** | | | | | | | |
| CatBoost | 0.814  (0.763-0.850) | 0.775  (0.676-0.867) | 0.751  (0.682-0.824) | **0.876**  (0.828-0.904) | 0.760  (0.703-0.799) | 0.751  (0.682-0.824) | **0.856**  (0.783-0.933) |
| GradientBoost | 0.799  (0.774-0.824) | 0.754  (0.688-0.828) | 0.732  (0.650-0.821) | 0.867  (0.829-0.916) | 0.738  (0.722-0.758) | 0.732  (0.650-0.821) | 0.845  (0.788-0.913) |
| XGBoost | 0.807  (0.765-0.835) | 0.758  (0.704-0.863) | 0.757  (0.682-0.859) | 0.866  (0.816-0.892) | 0.753  (0.733-0.775) | **0.757**  (0.682-0.859) | 0.839  (0.781-0.931) |
| LightGBM | 0.787  (0.753-0.811) | 0.738  (0.669-0.831) | 0.711  (0.623-0.799) | 0.865  (0.827-0.890) | 0.719  (0.651-0.746) | 0.711  (0.623-0.799) | 0.837  (0.782-0.913) |
| AdaBoost | 0.787  (0.776-0.799) | 0.723  (0.668-0.788) | 0.741  (0.624-0.828) | 0.831  (0.765-0.885) | 0.728  (0.693-0.765) | 0.741  (0.624-0.828) | 0.815  (0.762-0.892) |
| **Female < 60** | | | | | | | |
| CatBoost | 0.774  (0.708-0.815) | 0.796  (0.680-0.883) | 0.741  (0.671-0.853) | 0.846  (0.785-0.892) | 0.766  (0.690-0.842) | 0.741  (0.671-0.853) | 0.802  (0.703-0.879) |
| XGBoost | 0.747  (0.703-0.789) | 0.767  (0.669-0.856) | 0.720  (0.649-0.813) | 0.821  (0.777-0.859) | 0.740  (0.669-0.800) | 0.720  (0.649-0.813) | 0.767  (0.670-0.888) |
| LightGBM | 0.768  (0.705-0.836) | 0.790  (0.679-0.855) | 0.738  (0.571-0.863) | 0.815  (0.745-0.863) | 0.757  (0.669-0.854) | 0.738  (0.571-0.863) | 0.787  (0.670-0.890) |
| GradientBoost | 0.752  (0.708-0.786) | 0.768  (0.691-0.810) | 0.731  (0.653-0.806) | 0.812  (0.784-0.830) | 0.748  (0.703-0.808) | 0.731  (0.653-0.806) | 0.766  (0.689-0.845) |
| AdaBoost | 0.715  (0.678-0.760) | 0.732  (0.652-0.797) | 0.696  (0.488-0.806) | 0.739  (0.608-0.796) | 0.705  (0.598-0.787) | 0.696  (0.488-0.806) | 0.718  (0.608-0.881) |
| **Male from 60 to 64** | | | | | | | |
| CatBoost | 0.702  (0.630-0.766) | 0.711  (0.506-0.983) | 0.549  (0.344-0.791) | 0.822  (0.780-0.851) | 0.572  (0.503-0.624) | 0.549  (0.344-0.791) | 0.829  (0.555-0.994) |
| GradientBoost | 0.687  (0.600-0.773) | 0.692  (0.465-1.000) | 0.500  (0.340-0.703) | 0.772  (0.701-0.810) | 0.541  (0.412-0.621) | 0.500  (0.340-0.703) | 0.832  (0.603-1.000) |
| LightGBM | 0.702  (0.604-0.773) | 0.662  (0.506-0.855) | 0.610  (0.355-0.881) | 0.763  (0.651-0.831) | 0.596  (0.484-0.690) | 0.610  (0.355-0.881) | 0.791  (0.603-0.935) |
| XGBoost | 0.687  (0.630-0.766) | 0.641  (0.536-0.838) | 0.567  (0.367-0.791) | 0.759  (0.643-0.817) | 0.569  (0.478-0.624) | 0.567  (0.367-0.791) | 0.789  (0.555-0.912) |
| AdaBoost | 0.620  (0.522-0.736) | 0.568  (0.417-0.795) | 0.576  (0.295-0.791) | 0.639  (0.479-0.834) | 0.523  (0.408-0.624) | 0.576  (0.295-0.791) | 0.688  (0.379-0.912) |
| **Female from 60 to 64** | | | | | | | |
| CatBoost | 0.710  (0.555-0.850) | 0.669  (0.448-0.878) | 0.637  (0.431-0.808) | 0.759  (0.558-0.961) | 0.649  (0.438-0.840) | 0.637  (0.431-0.868) | 0.768  (0.669-0.893) |
| LightGBM | 0.690  (0.505-0.895) | 0.638  (0.356-0.888) | 0.657  (0.431-0.897) | 0.741  (0.576-0.952) | 0.643  (0.390-0.892) | 0.657  (0.431-0.897) | 0.721  (0.551-0.893) |
| GradientBoost | 0.690  (0.600-0.795) | 0.626  (0.423-0.787) | 0.626  (0.312-0.868) | 0.699  (0.522-0.910) | 0.619  (0.360-0.794) | 0.626  (0.312-0.868) | 0.731  (0.667-0.797) |
| XGBoost | 0.690  (0.600-0.840) | 0.634  (0.500-0.773) | 0.630  (0.436-0.868) | 0.676  (0.508-0.906) | 0.629  (0.465-0.817) | 0.630  (0.436-0.868) | 0.727  (0.667-0.827) |
| AdaBoost | 0.600  (0.500-0.740) | 0.540  (0.230-0.829) | 0.471  (0.165-0.735) | 0.609  (0.496-0.766) | 0.490  (0.194-0.695) | 0.471  (0.165-0.735) | 0.702  (0.517-0.885) |
| **Male ≥ 65** | | | | | | | |
| CatBoost | 0.792  (0.777-0.809) | 0.724  (0.667-0.792) | 0.692  (0.561-0.795) | 0.854  (0.815-0.875) | 0.705  (0.613-0.768) | 0.692  (0.561-0.795) | 0.846  (0.817-0.881) |
| GradientBoost | 0.770  (0.754-0.794) | 0.697  (0.621-0.787) | 0.650  (0.541-0.769) | 0.841  (0.791-0.877) | 0.671  (0.578-0.752) | 0.650  (0.541-0.769) | 0.837  (0.808-0.878) |
| LightGBM | 0.764  (0.737-0.782) | 0.682  (0.590-0.762) | 0.658  (0.524-0.728) | 0.836  (0.793-0.865) | 0.668  (0.557-0.712) | 0.658  (0.524-0.728) | 0.822  (0.787-0.856) |
| XGBoost | 0.760  (0.718-0.794) | 0.679  (0.555-0.776) | 0.646  (0.505-0.744) | 0.824  (0.768-0.859) | 0.660  (0.531-0.726) | 0.646  (0.505-0.704) | 0.822  (0.767-0.874) |
| AdaBoost | 0.765  (0.741-0.811) | 0.685  (0.598-0.766) | 0.649  (0.520-0.758) | 0.820  (0.760-0.870) | 0.666  (0.556-0.751) | 0.649  (0.520-0.758) | 0.828  (0.779-0.858) |
| **Female ≥ 65** | | | | | | | |
| CatBoost | 0.755  (0.718-0.774) | 0.711  (0.667-0.761) | 0.628  (0.536-0.690) | 0.833  (0.781-0.865) | 0.665  (0.601-0.713) | 0.628  (0.536-0.690) | 0.837  (0.804-0.882) |
| LightGBM | 0.748  (0.728-0.760) | 0.684  (0.684-0.703) | 0.657  (0.628-0.687) | 0.819  (0.790-0.831) | 0.669  (0.654-0.680) | 0.657  (0.628-0.687) | 0.806  (0.783-0.835) |
| XGBoost | 0.751  (0.727-0.779) | 0.695  (0.649-0.724) | 0.643  (0.593-0.701) | 0.815  (0.776-0.829) | 0.667  (0.626-0.701) | 0.643  (0.593-0.701) | 0.818  (0.770-0.860) |
| GradientBoost | 0.721  (0.692-0.776) | 0.660  (0.595-0.762) | 0.602  (0.535-0.674) | 0.812  (0.775-0.850) | 0.627  (0.578-0.677) | 0.602  (0.535-0.674) | 0.799  (0.733-0.880) |
| AdaBoost | 0.713  (0.688-0.736) | 0.642  (0.610-0.665) | 0.602  (0.517-0.658) | 0.776  (0.729-0.831) | 0.619  (0.570-0.645) | 0.602  (0.517-0.658) | 0.786  (0.754-0.812) |
| ACC, accuracy; AUC, area under curve; CI, confidence interval; SEN, sensitivity; SPE, specificity. | | | | | | | |

| **Table 3. Results of model output indicators in subgroups in SSH** | | | | | | | |
| --- | --- | --- | --- | --- | --- | --- | --- |
| **Model** | **ACC** | **Precision** | **Recall** | **AUC** | **F1 Score** | **SEN** | **SPE** |
| **Male < 60** | | | | | | | |
| CatBoost | 0.834  (0.817-0.846) | 0.642  (0.610-0.665) | 0.911  (0.889-0.944) | 0.914  (0.902-0.924) | 0.752  (0.740-0.772) | 0.911  (0.889-0.944) | 0.804  (0.770-0.828) |
| LightGBM | 0.806  (0.769-0.845) | 0.606  (0.552-0.664) | 0.878  (0.839-0.889) | 0.890  (0.870-0.905) | 0.716  (0.668-0.760) | 0.878  (0.839-0.889) | 0.779  (0.726-0.828) |
| XGBoost | 0.794  (0.771-0.815) | 0.583  (0.550-0.615) | 0.911  (0.889-0.944) | 0.887  (0.855-0.925) | 0.710  (0.694-0.742) | 0.911  (0.889-0.944) | 0.749  (0.704-0.787) |
| GradientBoost | 0.785  (0.714-0.829) | 0.582  (0.492-0.638) | 0.844  (0.778-0.889) | 0.885  (0.846-0.921) | 0.687  (0.630-0.742) | 0.844  (0.778-0.889) | 0.762  (0.651-0.809) |
| AdaBoost | 0.769  (0.694-0.829) | 0.565  (0.470-0.649) | 0.800  (0.683-0.833) | 0.833  (0.717-0.879) | 0.660  (0.562-0.630) | 0.800  (0.683-0.833) | 0.757  (0.647-0.828) |
| **Female < 60** | | | | | | | |
| CatBoost | 0.652  (0.596-0.704) | 0.522  (0.470-0.571) | 0.780  (0.710-0.800) | 0.762  (0.715-0.794) | 0.625  (0.566-0.667) | 0.780  (0.710-0.800) | 0.576  (0.529-0.647) |
| LightGBM | 0.644  (0.630-0.696) | 0.514  (0.500-0.564) | 0.760  (0.700-0.800) | 0.760  (0.742-0.791) | 0.613  (0.583-0.662) | 0.760  (0.700-0.800) | 0.576  (0.529-0.641) |
| XGBoost | 0.637  (0.593-0.733) | 0.511  (0.467-0.607) | 0.760  (0.700-0.800) | 0.752  (0.725-0.786) | 0.610  (0.560-0.690) | 0.760  (0.700-0.800) | 0.565  (0.476-0.694) |
| GradientBoost | 0.637  (0.596-0.667) | 0.507  (0.470-0.533) | 0.780  (0.710-0.800) | 0.747  (0.658-0.788) | 0.614  (0.566-0.640) | 0.780  (0.710-0.800) | 0.553  (0.529-0.588) |
| AdaBoost | 0.585  (0.519-0.663) | 0.457  (0.386-0.530) | 0.680  (0.510-0.800) | 0.699  (0.595-0.758) | 0.546  (0.439-0.638) | 0.680  (0.510-0.800) | 0.529  (0.476-0.582) |
| **Male from 60 to 64** | | | | | | | |
| AdaBoost | 0.720  (0.565-0.845) | 0.712  (0.584-0.827) | 0.836  (0.736-0.909) | 0.780  (0.664-0.921) | 0.769  (0.651-0.866) | 0.836  (0.736-0.909) | 0.578  (0.356-0.767) |
| GradientBoost | 0.740  (0.655-0.845) | 0.762  (0.703-0.828) | 0.764  (0.634-0.909) | 0.778  (0.666-0.866) | 0.759  (0.670-0.866) | 0.764  (0.636-0.909) | 0.711  (0.667-0.778) |
| CatBoost | 0.740  (0.655-0.800) | 0.756  (0.693-0.818) | 0.782  (0.655-0.818) | 0.735  (0.670-0.787) | 0.767  (0.675-0.818) | 0.782  (0.655-0.818) | 0.689  (0.567-0.778) |
| XGBoost | 0.650  (0.600-0.740) | 0.663  (0.645-0.742) | 0.745  (0.727-0.809) | 0.723  (0.649-0.828) | 0.701  (0.667-0.774) | 0.745  (0.727-0.809) | 0.533  (0.444-0.656) |
| LightGBM | 0.660  (0.560-0.745) | 0.669  (0.581-0.744) | 0.764  (0.727-0.818) | 0.687  (0.594-0.782) | 0.713  (0.646-0.779) | 0.764  (0.727-0.818) | 0.533  (0.356-0.656) |
| **Female from 60 to 64** | | | | | | | |
| GradientBoost | 0.692  (0.615-0.769) | 0.791  (0.750-0.851) | 0.756  (0.667-0.889) | 0.772  (0.650-0.883) | 0.769  (0.706-0.842) | 0.756  (0.677-0.889) | 0.550  (0.500-0.725) |
| CatBoost | 0.723  (0.692-0.769) | 0.817  (0.778-0.875) | 0.778  (0.778-0.778) | 0.772  (0.675-0.856) | 0.796  (0.778-0.824) | 0.778  (0.778-0.778) | 0.600  (0.500-0.750) |
| AdaBoost | 0.708  (0.623-0.769) | 0.813  (0.755-0.857) | 0.756  (0.667-0.889) | 0.750  (0.672-0.875) | 0.778  (0.710-0.842) | 0.756  (0.667-0.889) | 0.600  (0.500-0.750) |
| XGBoost | 0.738  (0.623-0.846) | 0.792  (0.730-0.882) | 0.844  (0.678-0.989) | 0.694  (0.567-0.800) | 0.815  (0.713-0.899) | 0.844  (0.678-0.989) | 0.500  (0.275-0.725) |
| LightGBM | 0.738  (0.623-0.838) | 0.804  (0.753-0.869) | 0.822  (0.678-0.989) | 0.678  (0.567-0.747) | 0.810  (0.713-0.894) | 0.822  (0.678-0.989) | 0.550  (0.500-0.725) |
| **Male ≥ 65** | | | | | | | |
| CatBoost | 0.762  (0.751-0.774) | 0.702  (0.694-0.713) | 0.819  (0.798-0.833) | 0.839  (0.830-0.847) | 0.756  (0.742-0.769) | 0.819  (0.798-0.833) | 0.715  (0.712-0.726) |
| GradientBoost | 0.743  (0.727-0.750) | 0.689  (0.679-0.695) | 0.781  (0.743-0.813) | 0.826  (0.817-0.845) | 0.732  (0.710-0.745) | 0.781  (0.743-0.813) | 0.712  (0.698-0.726) |
| LightGBM | 0.753  (0.733-0.796) | 0.704  (0.683-0.753) | 0.781  (0.743-0.783) | 0.818  (0.794-0.859) | 0.740  (0.715-0.782) | 0.781  (0.743-0.813) | 0.730  (0.698-0.782) |
| XGBoost | 0.730  (0.718-0.748) | 0.677  (0.611-0.699) | 0.767  (0.709-0.796) | 0.817  (0.795-0.837) | 0.718  (0.698-0.736) | 0.767  (0.709-0.796) | 0.700  (0.668-0.741) |
| AdaBoost | 0.745  (0.727-0.772) | 0.689  (0.663-0.733) | 0.793  (0.761-0.830) | 0.812  (0.795-0.829) | 0.737  (0.723-0.755) | 0.793  (0.761-0.830) | 0.706  (0.667-0.768) |
| **Female ≥ 65** | | | | | | | |
| CatBoost | 0.757  (0.743-0.773) | 0.762  (0.750-0.786) | 0.812  (0.769-0.841) | 0.823  (0.811-0.836) | 0.785  (0.767-0.796) | 0.812  (0.769-0.841) | 0.690  (0.667-0.736) |
| GradientBoost | 0.755  (0.702-0.795) | 0.755  (0.711-0.785) | 0.820  (0.769-0.861) | 0.808  (0.788-0.830) | 0.786  (0.739-0.821) | 0.820  (0.769-0.861) | 0.676  (0.619-0.714) |
| XGBoost | 0.738  (0.702-0.753) | 0.745  (0.717-0.778) | 0.796  (0.747-0.841) | 0.800  (0.780-0.821) | 0.769  (0.735-0.785) | 0.796  (0.747-0.841) | 0.667  (0.600-0.733) |
| LightGBM | 0.731  (0.683-0.753) | 0.743  (0.689-0.788) | 0.784  (0.747-0.822) | 0.796  (0.770-0.826) | 0.762  (0.726-0.781) | 0.784  (0.747-0.822) | 0.667  (0.579-0.755) |
| AdaBoost | 0.705  (0.649-0.731) | 0.736  (0.678-0.792) | 0.725  (0.686-0.798) | 0.767  (0.746-0.784) | 0.730  (0.683-0.765) | 0.725  (0.686-0.798) | 0.681  (0.600-0.779) |
| ACC, accuracy; AUC, area under curve; CI, confidence interval; SEN, sensitivity; SPE, specificity. | | | | | | | |

| **Table 4. Results of model output indicators in subgroups in SYSMH** | | | | | | | |
| --- | --- | --- | --- | --- | --- | --- | --- |
| **Model** | **ACC** | **Precision** | **Recall** | **AUC** | **F1 Score** | **SEN** | **SPE** |
| **Male < 60** | | | | | | | |
| CatBoost | 0.829  (0.822-0.838) | 0.745  (0.726-0.766) | 0.773  (0.727-0.819) | 0.912  (0.908-0.918) | 0.758  (0.746-0.778) | 0.773  (0.727-0.819) | 0.859  (0.844-0.882) |
| XGBoost | 0.825  (0.811-0.842) | 0.741  (0.698-0.798) | 0.768  (0.717-0.820) | 0.902  (0.894-0.910) | 0.753  (0.738-0.769) | 0.768  (0.717-0.820) | 0.855  (0.812-0.903) |
| LightGBM | 0.815  (0.803-0.824) | 0.737  (0.698-0.777) | 0.728  (0.655-0.788) | 0.900  (0.888-0.910) | 0.731  (0.699-0.754) | 0.728  (0.655-0.788) | 0.860  (0.819-0.898) |
| GradientBoosting | 0.828  (0.821-0.835) | 0.749  (0.719-0.793) | 0.762  (0.706-0.809) | 0.900  (0.891-0.911) | 0.754  (0.736-0.769) | 0.762  (0.706-0.809) | 0.863  (0.834-0.902) |
| AdaBoost | 0.823  (0.814-0.835) | 0.718  (0.687-0.734) | 0.808  (0.731-0.863) | 0.881  (0.873-0.894) | 0.759  (0.732-0.783) | 0.808  (0.731-0.863) | 0.830  (0.791-0.859) |
| **Female < 60** | | | | | | | |
| CatBoost | 0.774  (0.708-0.815) | 0.607  (0.539-0.665) | 0.718  (0.682-0.768) | 0.846  (0.785-0.892) | 0.766  (0.690-0.842) | 0.741  (0.671-0.853) | 0.802  (0.703-0.879) |
| XGBoost | 0.747  (0.703-0.789) | 0.556  (0.530-0.583) | 0.745  (0.645-0.818) | 0.821  (0.777-0.859) | 0.740  (0.669-0.800) | 0.720  (0.649-0.813) | 0.767  (0.670-0.888) |
| LightGBM | 0.768  (0.705-0.836) | 0.542  (0.504-0.564) | 0.727  (0.600-0.859) | 0.815  (0.745-0.863) | 0.757  (0.669-0.854) | 0.738  (0.571-0.863) | 0.787  (0.670-0.890) |
| GradientBoosting | 0.752  (0.708-0.786) | 0.586  (0.522-0.624) | 0.745  (0.686-0.814) | 0.812  (0.784-0.830) | 0.748  (0.703-0.808) | 0.731  (0.653-0.806) | 0.766  (0.689-0.845) |
| AdaBoost | 0.715  (0.678-0.760) | 0.530  (0.475-0.588) | 0.727  (0.645-0.773) | 0.739  (0.608-0.796) | 0.705  (0.598-0.787) | 0.696  (0.488-0.806) | 0.718  (0.608-0.881) |
| **Male from 60 to 64** | | | | | | | |
| CatBoost | 0.741  (0.718-0.763) | 0.747  (0.679-0.821) | 0.621  (0.576-0.665) | 0.799  (0.782-0.840) | 0.675  (0.661-0.697) | 0.621  (0.576-0.665) | 0.833  (0.759-0.903) |
| LightGBM | 0.738  (0.688-0.782) | 0.737  (0.682-0.808) | 0.618  (0.526-0.652) | 0.789  (0.751-0.839) | 0.672  (0.594-0.721) | 0.618  (0.526-0.652) | 0.830  (0.792-0.881) |
| XGBoost | 0.726  (0.697-0.772) | 0.706  (0.662-0.771) | 0.636  (0.608-0.679) | 0.785  (0.745-0.829) | 0.669  (0.635-0.720) | 0.636  (0.608-0.679) | 0.795  (0.757-0.847) |
| AdaBoost | 0.725  (0.680-0.774) | 0.722  (0.631-0.807) | 0.615  (0.533-0.705) | 0.780  (0.737-0.841) | 0.660  (0.606-0.710) | 0.615  (0.533-0.705) | 0.809  (0.712-0.894) |
| GradientBoosting | 0.717  (0.698-0.753) | 0.730  (0.672-0.816) | 0.564  (0.517-0.618) | 0.778  (0.747-0.833) | 0.634  (0.604-0.665) | 0.564  (0.517-0.618) | 0.835  (0.769-0.903) |
| **Female from 60 to 64** | | | | | | | |
| CatBoost | 0.826  (0.794-0.867) | 0.769  (0.688-0.813) | 0.752  (0.626-0.831) | 0.904  (0.876-0.917) | 0.756  (0.698-0.819) | 0.752  (0.626-0.831) | 0.868  (0.791-0.905) |
| XGBoost | 0.802  (0.763-0.826) | 0.715  (0.642-0.749) | 0.762  (0.693-0.810) | 0.880  (0.871-0.897) | 0.736  (0.704-0.771) | 0.762  (0.693-0.810) | 0.824  (0.750-0.865) |
| GradientBoosting | 0.812  (0.771-0.835) | 0.744  (0.652-0.802) | 0.748  (0.690-0.807) | 0.876  (0.861-0.899) | 0.743  (0.716-0.775) | 0.748  (0.690-0.807) | 0.849  (0.755-0.901) |
| LightGBM | 0.798  (0.785-0.809) | 0.723  (0.692-0.757) | 0.729  (0.600-0.852) | 0.867  (0.845-0.889) | 0.720  (0.669-0.764) | 0.729  (0.600-0.852) | 0.838  (0.785-0.891) |
| AdaBoost | 0.729  (0.698-0.802) | 0.613  (0.560-0.736) | 0.738  (0.650-0.807) | 0.788  (0.747-0.866) | 0.665  (0.629-0.726) | 0.738  (0.650-0.807) | 0.724  (0.650-0.855) |
| **Male ≥ 65** | | | | | | | |
| CatBoost | 0.742  (0.737-0.750) | 0.642  (0.631-0.653) | 0.777  (0.764-0.805) | 0.818  (0.809-0.823) | 0.703  (0.697-0.710) | 0.777  (0.764-0.805) | 0.720  (0.696-0.735) |
| GradientBoosting | 0.741  (0.724-0.764) | 0.639  (0.620-0.664) | 0.781  (0.755-0.812) | 0.817  (0.806-0.828) | 0.703  (0.686-0.729) | 0.781  (0.755-0.812) | 0.715  (0.696-0.737) |
| LightGBM | 0.740  (0.714-0.756) | 0.641  (0.614-0.664) | 0.768  (0.728-0.798) | 0.815  (0.803-0.829) | 0.699  (0.667-0.715) | 0.768  (0.728-0.798) | 0.721  (0.692-0.750) |
| XGBoost | 0.732  (0.720-0.746) | 0.631  (0.618-0.641) | 0.767  (0.744-0.805) | 0.807  (0.794-0.819) | 0.692  (0.677-0.713) | 0.767  (0.744-0.805) | 0.710  (0.701-0.725) |
| AdaBoost | 0.730  (0.722-0.738) | 0.626  (0.617-0.634) | 0.771  (0.746-0.792) | 0.801  (0.791-0.807) | 0.691  (0.683-0.704) | 0.771  (0.746-0.792) | 0.703  (0.692-0.718) |
| **Female ≥ 65** | | | | | | | |
| CatBoost | 0.803  (0.790-0.811) | 0.691  (0.671-0.712) | 0.803  (0.777-0.828) | 0.866  (0.863-0.872) | 0.743  (0.725-0.754) | 0.803  (0.777-0.828) | 0.803  (0.782-0.825) |
| GradientBoosting | 0.780  (0.764-0.788) | 0.656  (0.630-0.672) | 0.803  (0.772-0.822) | 0.856  (0.843-0.867) | 0.722  (0.708-0.732) | 0.803  (0.772-0.822) | 0.768  (0.739-0.793) |
| LightGBM | 0.778  (0.761-0.794) | 0.652  (0.628-0.666) | 0.801  (0.757-0.848) | 0.854  (0.842-0.870) | 0.719  (0.701-0.744) | 0.801  (0.757-0.848) | 0.765  (0.739-0.783) |
| XGBoost | 0.778  (0.764-0.792) | 0.651  (0.628-0.668) | 0.807  (0.779-0.822) | 0.851  (0.840-0.869) | 0.720  (0.709-0.736) | 0.807  (0.779-0.822) | 0.762  (0.735-0.786) |
| AdaBoost | 0.769  (0.757-0.776) | 0.643  (0.623-0.656) | 0.784  (0.758-0.803) | 0.833  (0.827-0.838) | 0.706  (0.696-0.717) | 0.784  (0.758-0.803) | 0.760  (0.738-0.782) |
| ACC, accuracy; AUC, area under curve; CI, confidence interval; SEN, sensitivity; SPE, specificity. | | | | | | | |
